# Supplementary material for: Microbiological and Physicochemical Evaluation of Hydroxypropyl Methylcellulose (HPMC) and Propolis Film Coatings for Cheese Preservation
Source: MDPI journal article supplement (doi:10.3390/molecules29091941), 2024-04-24
Supplement: s1 [file s1]

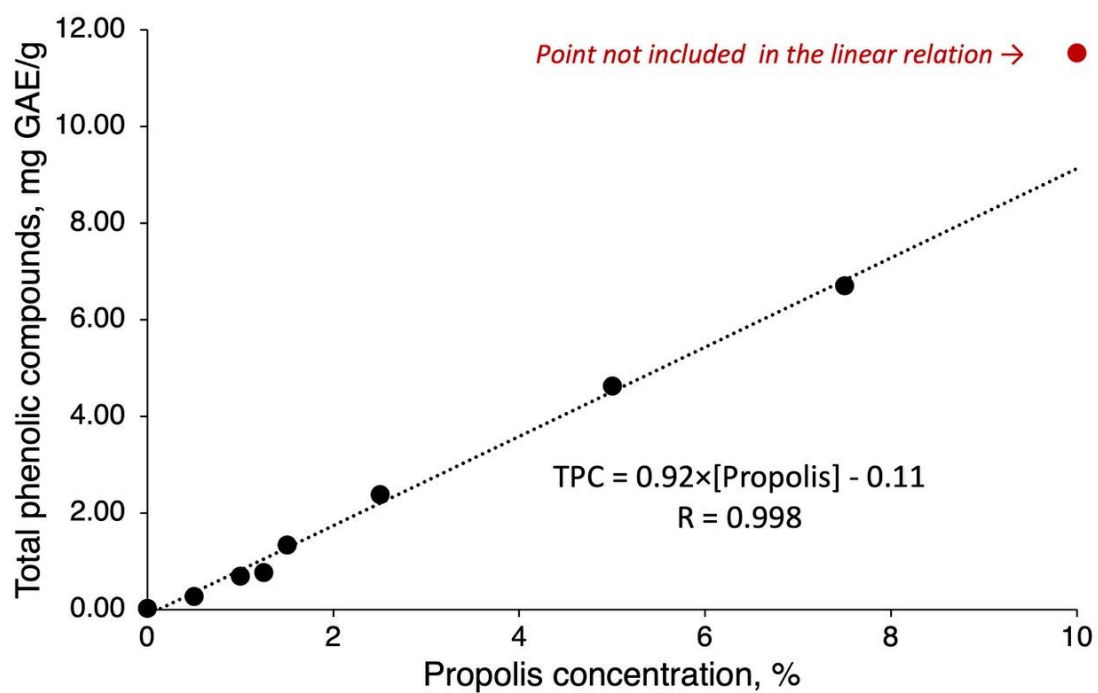

**Figure S1.** Linear relationship between total phenolic compounds (mg GAE/g) of formulations with different propolis concentrations.

**Table S1.** Total phenolic compounds (mg GAE/g) of formulations with different concentrations of propolis.

| Parameter | Phenolic compounds |
|-----------|--------------------|
| P0.00%    | 0.03±0.01          |
| P0.50%    | 0.29±0.03          |
| P1.00%    | 0.71±0.14          |
| P1.25%    | 0.78±0.31          |
| P1.50%    | 1.34±0.11          |
| P2.50%    | 2.39±0.35          |
| P5.00%    | 4.64±0.91          |
| P7.50%    | 6.72±0.97          |
| P10.00%   | 11.54±0.31         |
